# Supplementary material
Source: MDPI journal article supplement (https://www.mdpi.com/2071-1050/12/7/3034)
Supplement: s1 [file s1]

**Supplementary Materials:** The following are available online at [www.mdpi.com/xxx/s1](http://www.mdpi.com/xxx/s1).

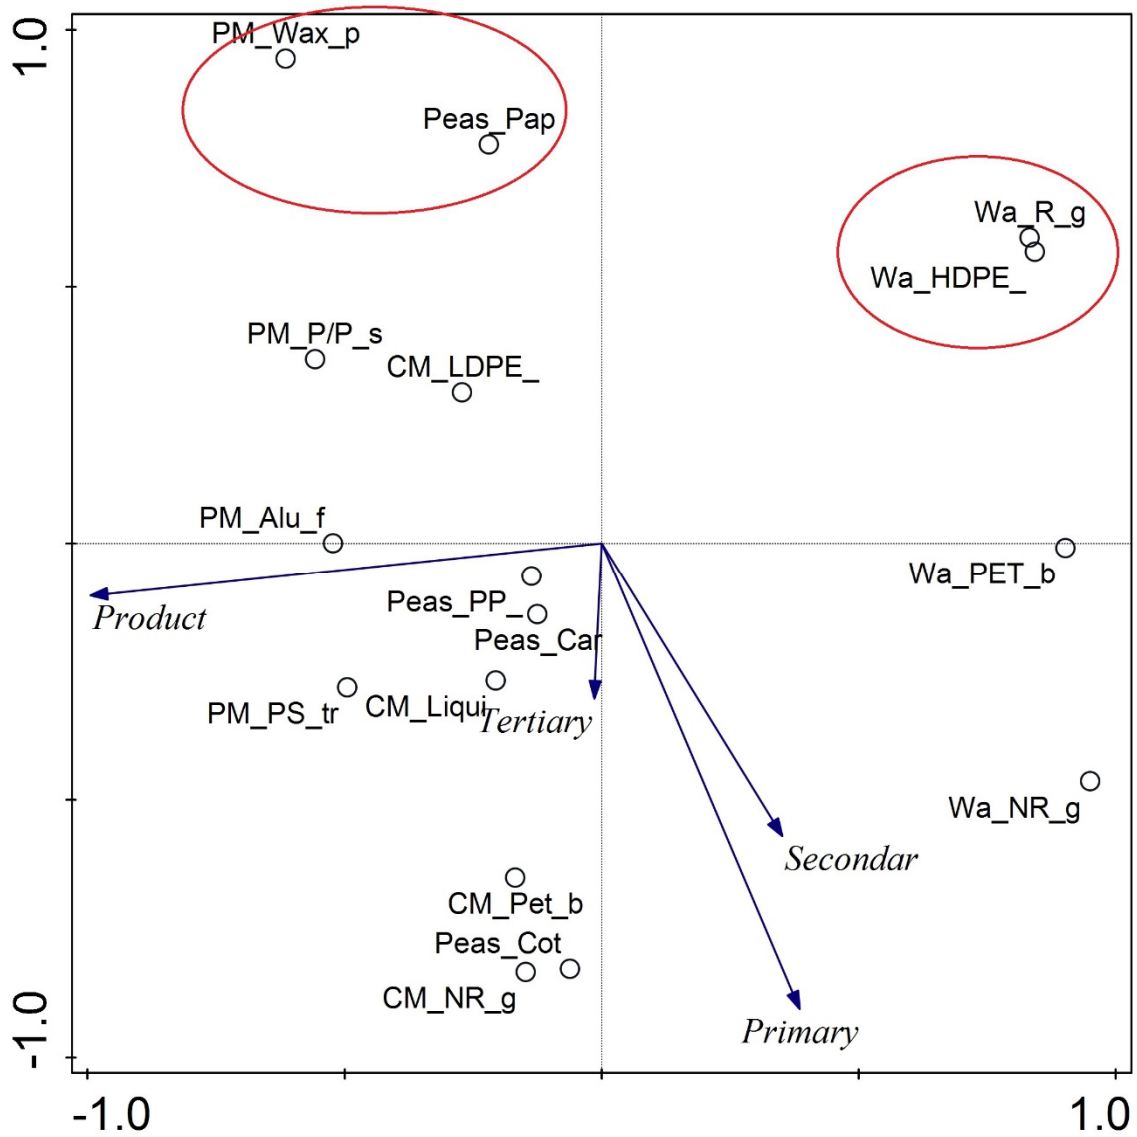

**Figure S1.** Principal component analysis of variations of climate change impact for different types of packaging and products for Energy Recovery Scenario.

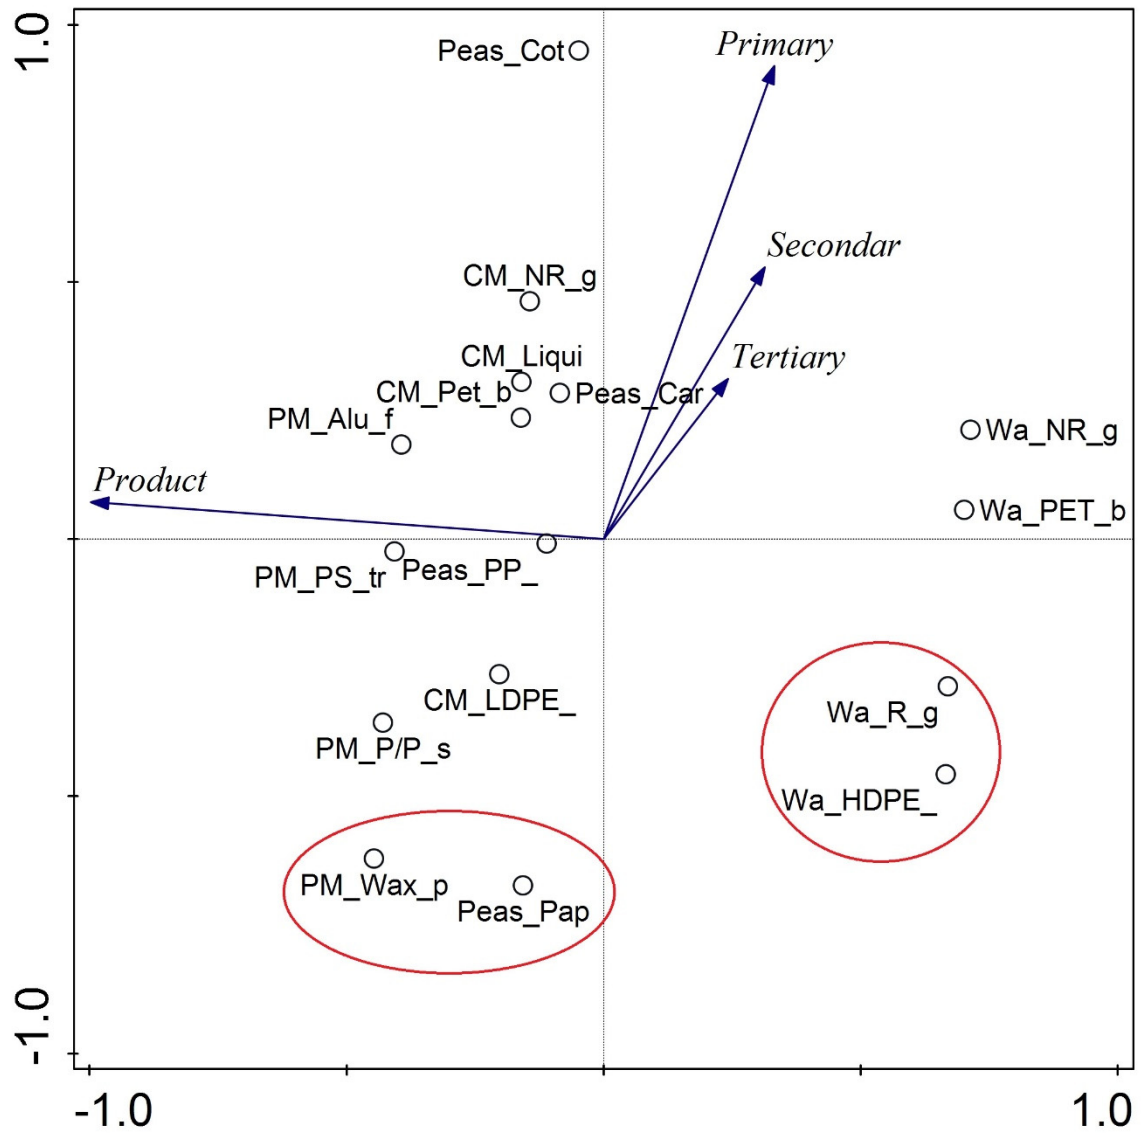

**Figure S2.** Principal component analysis of variations of climate change impact for different types of packaging and products for Material Recovery Scenario.

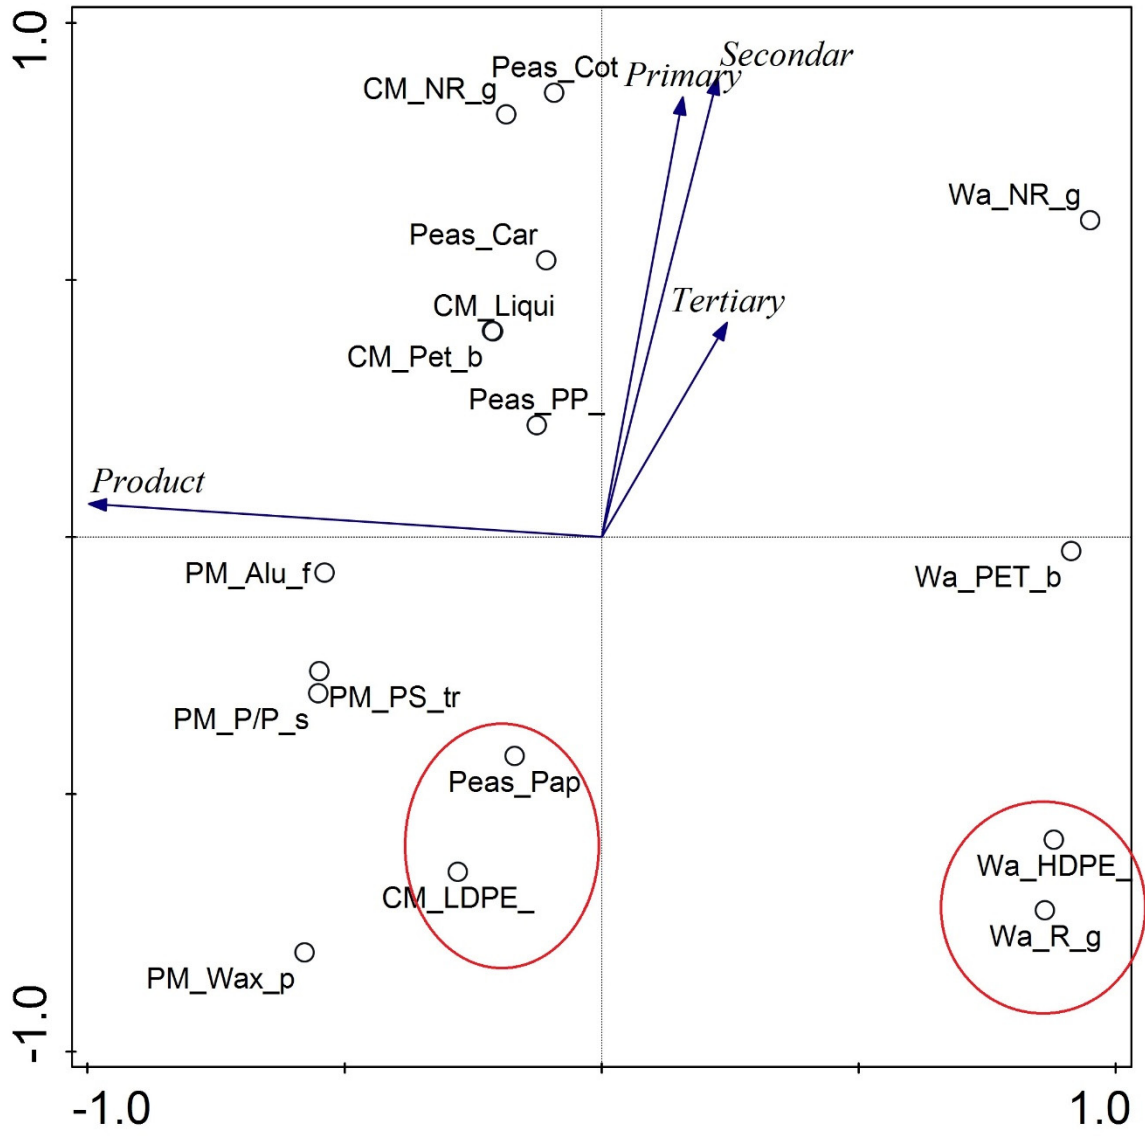

**Figure S3.** Principal component analysis of variations of climate change impact for different types of packaging and products for Landfilling Scenario.
